# Supplementary material for: Y2O3-YAG:Ce composite phosphor ceramics with enhanced light extraction efficiency for solid-state laser lighting
Source: Royal Society of Chemistry journal article supplement (doi:10.1039/d2tc03606a), 2022-01-01
Supplement: d2tc03606a1.pdf [file d2tc03606a1.pdf]

## Electronic Supplementary Information

### **Y<sub>2</sub>O<sub>3</sub>-YAG:Ce composite phosphor ceramic with enhanced light extraction efficiency for solid state laser lighting**

Hailiang Fang,<sup>ab</sup> Beiying Zhou,<sup>\*ac</sup> Jiancheng Wang,<sup>b</sup> Xiaobo Hu,<sup>b</sup> Zesheng Pan,<sup>b</sup> Shengjie Fan,<sup>b</sup> Ping Huang,<sup>b</sup> Shijia Gu,<sup>ac</sup> Lianjun Wang,<sup>\*ab</sup> Wan Jiang,<sup>\*ac</sup>

<sup>a</sup> *Engineering Research Center of Advanced Glasses Manufacturing Technology, Ministry of Education, Donghua University, Shanghai, P. R. China*

<sup>b</sup> *State Key Laboratory for Modification of Chemical Fibers and Polymer Materials & College of Materials Science and Engineering, Donghua University, Shanghai, P. R. China*

<sup>c</sup> *Institute of Functional Materials, Donghua University, Shanghai, P. R. China*

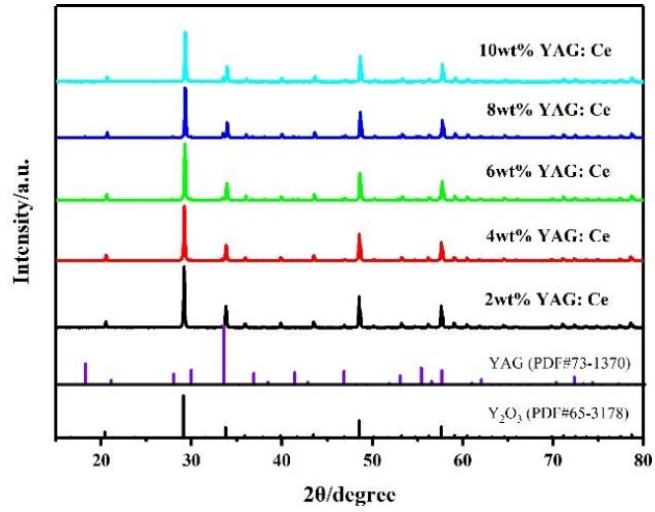

**Figure S1** XRD pattern of  $Y_2O_3$ -YAG:Ce composite phosphor ceramics with different YAG:Ce phosphor contents.

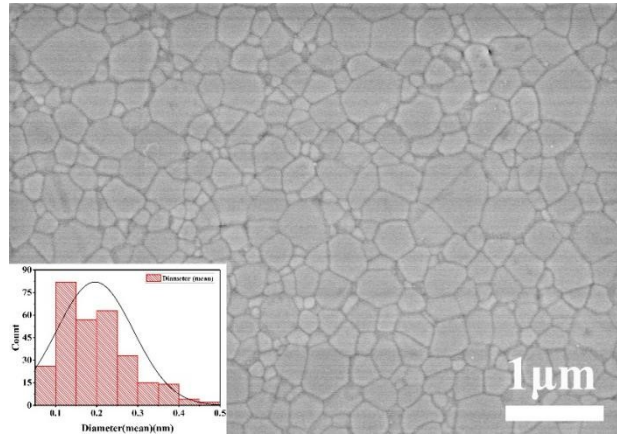

**Figure S2** The surface SEM image of  $Y_2O_3$ -YAG:Ce composite phosphor ceramic after thermal etching and the result of the grain size distribution shows in inset.

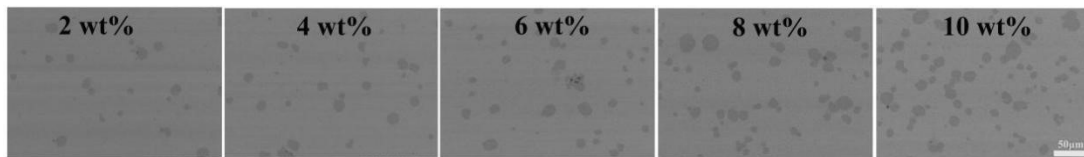

**Figure S3** The backscattered SEM images of  $Y_2O_3$ -YAG:Ce composite phosphor ceramics with different YAG:Ce phosphor contents.

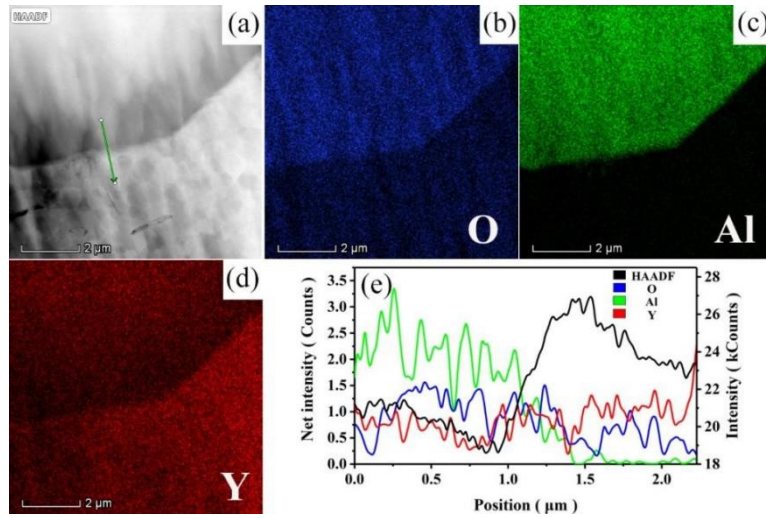

**Figure S4** TEM image (a) of the composite phosphor ceramic with 6 wt% YAG:Ce phosphor and the EDS element mapping images from (b) to (d). The HAADF curves (e) of different element according to the green straight line from the phosphor particles to the polycrystalline  $\text{Y}_2\text{O}_3$  matrix.

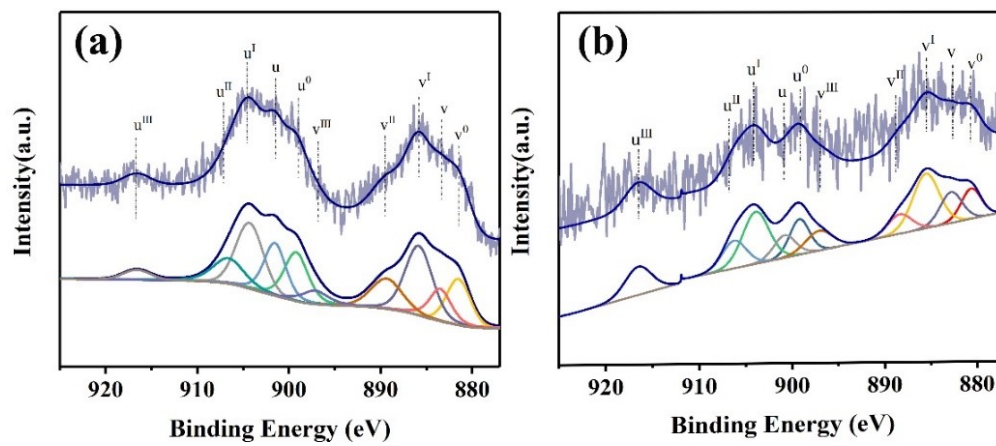

**Figure S5** X-ray photoelectron spectroscopy (XPS) spectra of Ce  $3d_{3/2,5/2}$  in (a) YAG:Ce phosphor and (b)  $\text{Y}_2\text{O}_3$ -YAG:Ce composite phosphor ceramic and corresponding fitting curves.

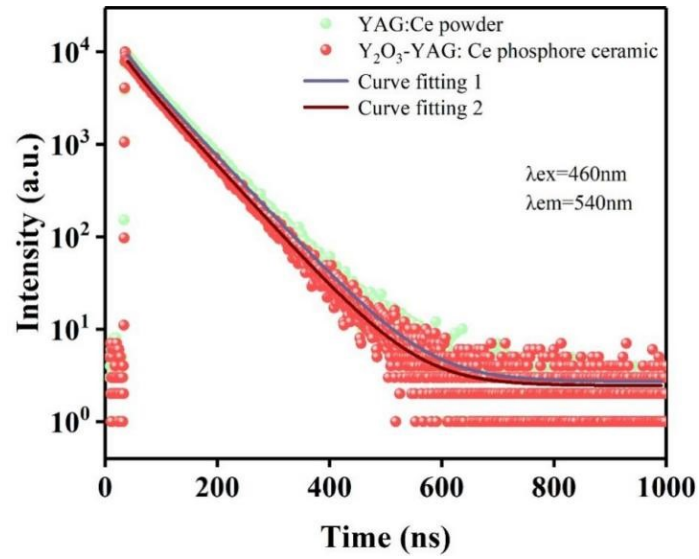

**Figure S6** The YAG:Ce fluorescence decay curves of YAG:Ce phosphor and  $Y_2O_3$ -YAG:Ce phosphor ceramic and corresponding fitting curves, the fitting curve 1 is for YAG:Ce phosphor, fitting curve 2 is for  $Y_2O_3$ -YAG:Ce phosphor ceramic. The excitation wavelength and emission wavelength were 460 nm and 540 nm, respectively.

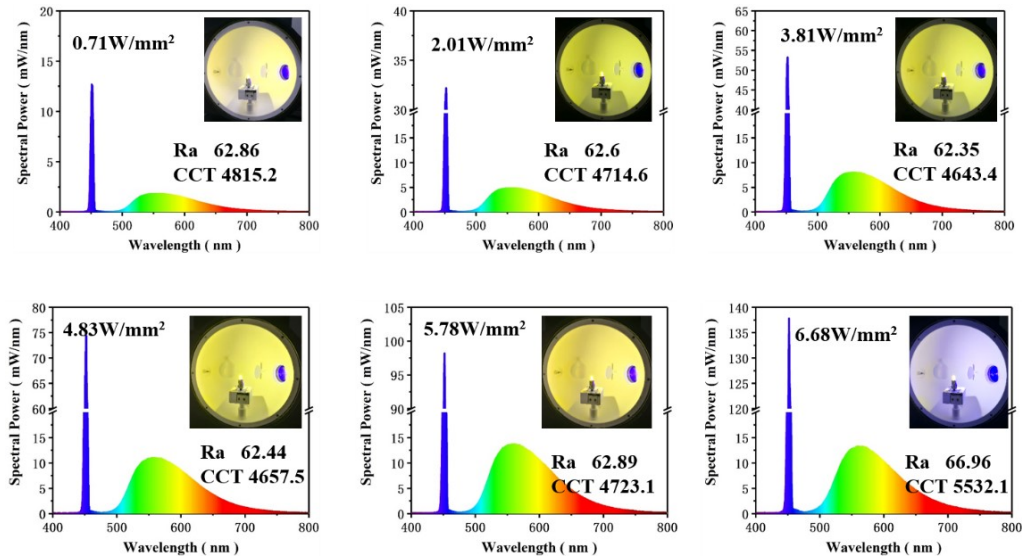

**Figure S7** Luminescence spectra and corresponding color rendering index (CRI), correlated color temperature (CCT) and physical images of  $Y_2O_3$ -YAG:Ce phosphor ceramic with 8 wt% concentration under 450 nm blue lasers with different power densities.

**Table S1.** The core excitation binding energy (eV) of Ce 3d and the corresponding atomic relative area are collected from Ce<sup>4+</sup> and Ce<sup>3+</sup> in YAG:Ce phosphor and Y<sub>2</sub>O<sub>3</sub>-YAG:Ce phosphor ceramic with 20 wt% phosphor contents.

|                        | Ce:<br>YAG        | Peak/eV | Area/a.u | Relative<br>perc/% | Phos<br>Cera      | Peak/eV | Area/a.u. | Relative<br>perc/% |
|------------------------|-------------------|---------|----------|--------------------|-------------------|---------|-----------|--------------------|
| Ce <sup>4+</sup><br>3d | 3d <sub>3/2</sub> | 901.55  | 1930.21  | 43.51%             | 3d <sub>3/2</sub> | 900.80  | 792.80    | 45.81%             |
|                        | 3d <sub>5/2</sub> | 883.49  | 1252.54  |                    | 3d <sub>5/2</sub> | 882.81  | 1100.76   |                    |
|                        | 3d <sub>3/2</sub> | 906.61  | 1386.52  |                    | 3d <sub>3/2</sub> | 906.23  | 1068.92   |                    |
|                        | 3d <sub>5/2</sub> | 889.36  | 1535.88  |                    | 3d <sub>5/2</sub> | 888.36  | 750.65    |                    |
|                        | 3d <sub>3/2</sub> | 916.57  | 409.54   |                    | 3d <sub>3/2</sub> | 916.50  | 1200.97   |                    |
|                        | 3d <sub>5/2</sub> | 897.16  | 696.69   |                    | 3d <sub>5/2</sub> | 897.09  | 845.47    |                    |
| Ce <sup>3+</sup><br>3d | 3d <sub>3/2</sub> | 899.22  | 1965.08  | 56.49%             | 3d <sub>3/2</sub> | 899.21  | 1129.65   | 54.92%             |
|                        | 3d <sub>5/2</sub> | 881.51  | 1657.74  |                    | 3d <sub>5/2</sub> | 880.62  | 987.20    |                    |
|                        | 3d <sub>3/2</sub> | 904.32  | 2708.86  |                    | 3d <sub>3/2</sub> | 903.91  | 2218.43   |                    |
|                        | 3d <sub>5/2</sub> | 885.85  | 3031.41  |                    | 3d <sub>5/2</sub> | 885.54  | 2336.19   |                    |

**Table S2.** The luminous flux (LF), LE, CCT, CRI and the CIE color coordinates (x, y) of Y<sub>2</sub>O<sub>3</sub>-YAG:Ce composite phosphor ceramic with different YAG:Ce phosphor contents under 450 nm blue laser light radiation with 4.24 W mm<sup>-2</sup> powder density.

| Sample         | CCT  | CRI | CIE color<br>coordinates<br>(x, y) | LF (lm) | LE (lm W <sup>-1</sup> ) |
|----------------|------|-----|------------------------------------|---------|--------------------------|
| 2 wt% YAG: Ce  | 8314 | 73  | (0.2987, 0.2839)                   | 489.47  | 147.02                   |
| 4 wt% YAG: Ce  | 5335 | 66  | (0.3364, 0.3453)                   | 538.22  | 161.66                   |
| 6 wt% YAG: Ce  | 5564 | 66  | (0.331, 0.3286)                    | 549.53  | 165.06                   |
| 8 wt% YAG: Ce  | 4638 | 62  | (0.357, 0.3664)                    | 593.28  | 178.20                   |
| 10 wt% YAG: Ce | 4884 | 63  | (0.3477, 0.3474)                   | 545.29  | 163.79                   |

**Table S3.** Saturation power densities, LF and LE for the reported LDs adopting phosphor in glass,

transparent ceramic and CPCs as color converters.

| Composition                                                                                                               | Saturation Power Density (W/mm <sup>2</sup> ) | LF (lm) | LE (lm/W) | Reference        |
|---------------------------------------------------------------------------------------------------------------------------|-----------------------------------------------|---------|-----------|------------------|
| YAG:Ce phosphor in silica glass (PiSG)                                                                                    | 3.46                                          | —       | —         | 1                |
| Single-phase YAG:Ce transparent ceramic                                                                                   | 11.94                                         | 700     | 123.3     | 2                |
| Y <sub>3-x</sub> Mg <sub>x</sub> Al <sub>5-2x</sub> Si <sub>x</sub> O <sub>12</sub> :0.5%Ce (x=0.005) transparent ceramic | ~4.0                                          | ~650    | 223       | 3                |
| Al <sub>2</sub> O <sub>3</sub> -YAG:Ce CPCs                                                                               | 20.1                                          | 1367    | 135.3     | 2                |
|                                                                                                                           | —                                             | 1200    | 165       | 5                |
|                                                                                                                           | 32                                            | —       | 305       | 6                |
| BaAl <sub>2</sub> O <sub>4</sub> -YAG:Ce CPCs                                                                             | —                                             | 479     | 37        | 7                |
| MgO-YAG:Ce CPCs                                                                                                           | 32.2                                          | 3979    | 292       | 8                |
| AlN-YAG:Ce CPCs                                                                                                           | —                                             | 639     | 266       | 9                |
| YAG-YAG:Ce CPCs                                                                                                           | 9.60                                          | —       | 142       | 10               |
| Y <sub>2</sub> O <sub>3</sub> -YAG:Ce CPCs                                                                                | 6.14                                          | 805     | 178.4     | <b>This work</b> |

- 1 D. Zhang, W. Xiao, C. Liu, et al. Highly efficient phosphor-glass composites by pressureless sintering, *Nat Commun*, **2020**, *11* (1), 2805.
- 2 J. Wang, X. Tang, P. Zheng, et al. Thermally self-managing YAG:Ce-Al<sub>2</sub>O<sub>3</sub> color converters enabling high-brightness laser-driven solid state lighting in a transmissive configuration, *J Mater Chem C*, **2019**, *7* (13), 3901-3908.
- 3 J. Kang, L. Zhang, Y. Li, et al. Luminescence declining behaviors in YAG:Ce transparent ceramics for high power laser lighting, *J Mater Chem C*, **2019**, *7* (45), 14357.
- 4 Q. Yao, P. Hu, P. Sun, et al. YAG:Ce(3+) transparent ceramic phosphors brighten the next-generation laser-driven lighting. *Adv Mater*, **2020**, *32* (19), 1907888.
- 5 C. Cozzan, G. Lheureux, N. O'Dea, et al. Stable, Heat-Conducting Phosphor Composites for High-Power Laser Lighting, *ACS Appl Mater Interfaces*, **2018**, *10* (6), 5673-5681.
- 6 Z. Liu, S. Li, Y. Huang, et al. The effect of the porosity on the Al<sub>2</sub>O<sub>3</sub>-YAG:Ce phosphor ceramic: Microstructure, luminescent efficiency, and luminous stability in laser-driven lighting, *J Alloys Compd*, **2019**, *785*, 125-130.
- 7 Y. Tian, J. Chen, X. Yi, et al. A new BaAl<sub>2</sub>O<sub>4</sub>-YAG: Ce composite ceramic phosphor for white LEDs and LDs lighting, *J Eur Ceram Soc*, **2021**, *41*, 4343-4348.
- 8 H. Zhao, H. Yu, J. Xu, et al. Novel high-thermal-conductivity composite ceramic phosphors for high-brightness laser-driven lighting, *J Mater Chem C*, **2021**, *9* (32), 10487-10496.
- 9 K. Fujioka, K. Yagasaki, T. Sawada, et al. AlN-Ce-doped yttrium aluminum garnet composite ceramic phosphor

- for high-power laser lighting. *Opt Mater*, **2021**, 121, 111507.
- 10 Q. Zhu, S. Li, Q. Yuan, et al. Transparent YAG:Ce ceramic with designed low light scattering for high-power blue LED and LD applications. *J Eur Ceram Soc*, **2021**, 41(1), 735-740.
